# Supplementary material for: Fragmentation of ice particles: laboratory experiments on graupel–graupel and graupel–snowflake collisions
Source: Copernicus journal article supplement (doi:10.5194/acp-23-13505-2023), 2023-10-25
Supplement: Supplementary file 1 [file acp-23-13505-2023-supplement.pdf]

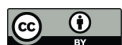

*Supplement of*

## **Fragmentation of ice particles: laboratory experiments on graupel–graupel and graupel–snowflake collisions**

**Pierre Grzegorzczak et al.**

*Correspondence to:* Miklós Szakáll (szakall@uni-mainz.de)

The copyright of individual parts of the supplement might differ from the article licence.

## S1 Graupel free fall equations

The equation of motion for a spherical liquid drop from Pruppacher and Klett (2010) can be used to describe the motion of a lump graupel which is almost spherical with

$$m_g \frac{dv}{dt} = (m_g + m_a)g - \frac{1}{2}\rho_a C_d A v^2 = \left(1 - \frac{\rho_a}{\rho_g}\right)g - \frac{3}{8} \frac{C_d \rho_a}{\rho_g r} v^2. \quad (\text{C1})$$

where  $m_g$  and  $m_a$  the graupel and air masses,  $\rho_g$  and  $\rho_a$  are the graupel and air densities,  $g$  the acceleration,  $A$  the graupel cross section,  $C_d$  the drag coefficient,  $r$  the radius of the graupel and  $v$  the graupel fall speed. The previous equation can be simplified with  $C_1$  and  $C_2$  terms:

$$\frac{dv}{dt} = C_1 - C_2 v^2. \quad (\text{S2})$$

Equation S2 have to be integrated to deduce the speed and the position of the graupel during the fall speed as

$$t = \int \frac{1}{C_1 - C_2 v^2} dv = \int \frac{1}{(\sqrt{C_1} - \sqrt{C_2}v)(\sqrt{C_1} + \sqrt{C_2}v)} dv \quad (\text{S3})$$

$$t = \int \frac{1}{2\sqrt{C_1}(\sqrt{C_1} + \sqrt{C_2}v)} + \frac{1}{2\sqrt{C_1}(\sqrt{C_1} - \sqrt{C_2}v)} dv \quad (\text{S4})$$

$$t = \frac{1}{2\sqrt{C_1}} \left( \frac{\ln(\sqrt{C_1} + \sqrt{C_2}v)}{\sqrt{C_2}} - \frac{\ln(\sqrt{C_1} - \sqrt{C_2}v)}{\sqrt{C_2}} \right) = \frac{1}{2\sqrt{C_1}C_2} \ln \left( \frac{1 + \sqrt{C_2}/\sqrt{C_1}v}{1 - \sqrt{C_2}/\sqrt{C_1}v} \right). \quad (\text{S5})$$

From Eq. S5 and the arctanh function properties

$$t = \frac{1}{\sqrt{C_1}C_2} \operatorname{arctanh} \left( \frac{\sqrt{C_2}}{\sqrt{C_1}} v \right). \quad (\text{S6})$$

By integrating Eq. S6, one can deduce the speed of the graupel depending on the time

$$v = \frac{\sqrt{C_1}}{\sqrt{C_2}} \tanh \left( \sqrt{C_1} \sqrt{C_2} t \right). \quad (\text{S7})$$

To know the position of the graupel according to the time, equation S7 have to be integrated. With the properties of the tanh function, the position of the graupel is expressed by

$$x = \frac{1}{\sqrt{C_1}} \ln \left( \cosh \left( \sqrt{C_1} \sqrt{C_2} t \right) \right). \quad (\text{S8})$$

If  $t \rightarrow \infty$ , the fall velocity becomes equal to the terminal velocity  $v_T$  of the graupel:

$$v_T = \sqrt{\frac{8r(\rho_a/\rho_g - 1)g}{3C_d}}. \quad (\text{S9})$$

## S2 Fragments size distributions

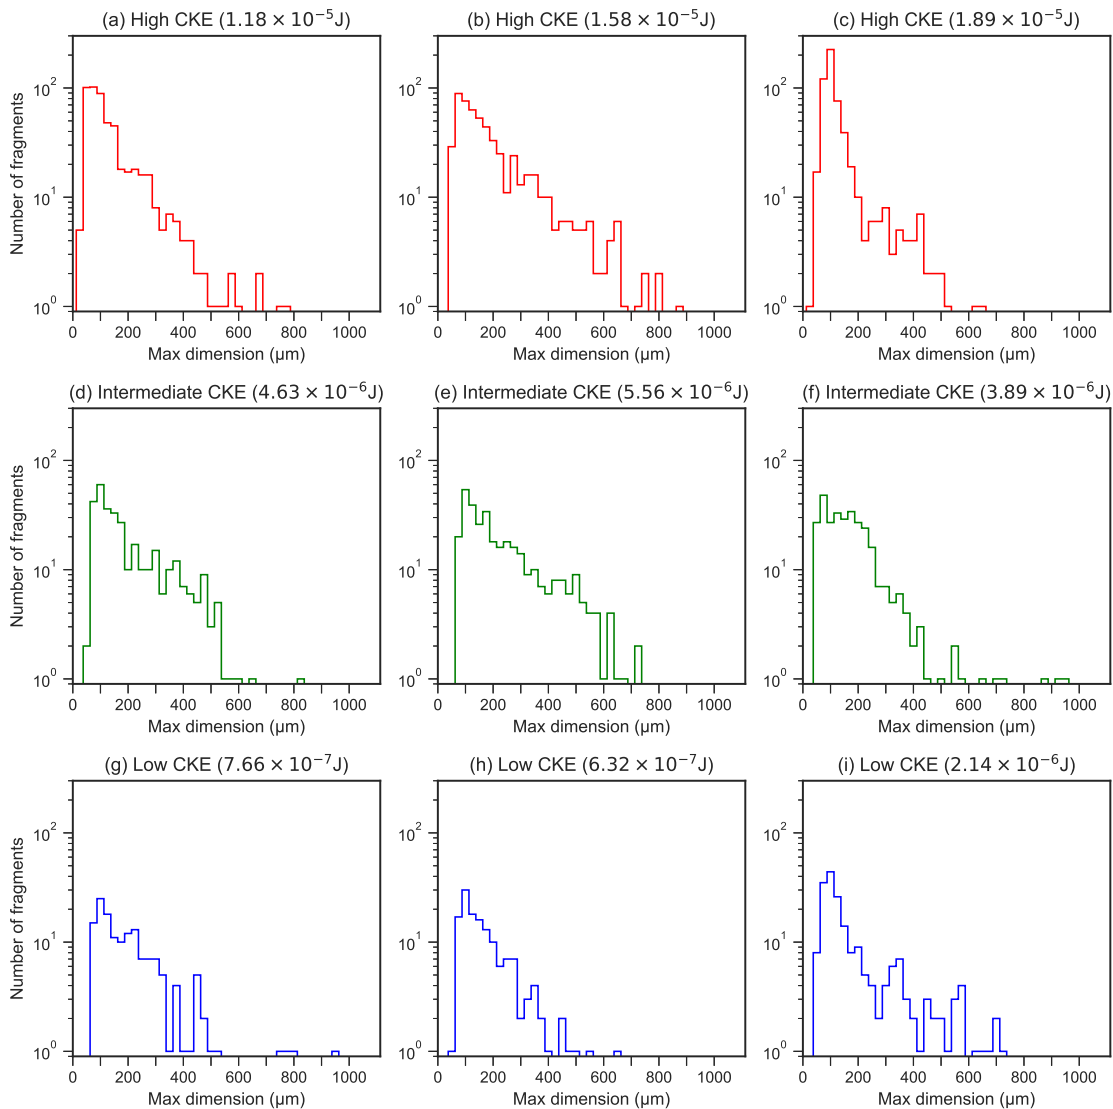

Figure S1: Size distributions of ice fragments produced by graupel-graupel with dendrites collisions. Low CKE in blue, intermediate CKE and high CKE in red.

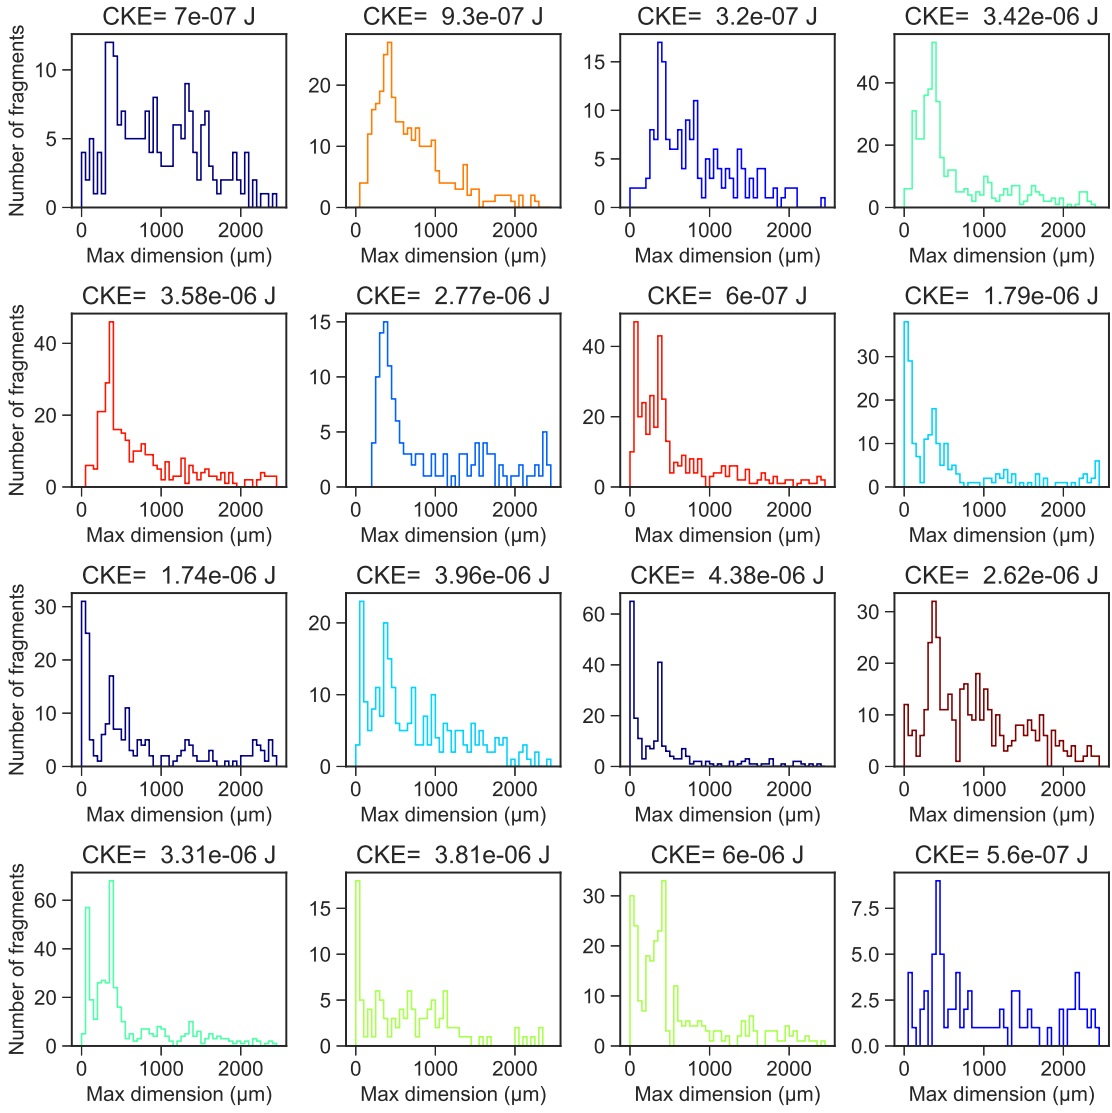

Figure S2: Size distributions of ice fragments produced by graupel-snowflake collisions for different impact positions (see color scale of Fig. 14).

## S3 Distributions for the cross sectional areas of the fragments

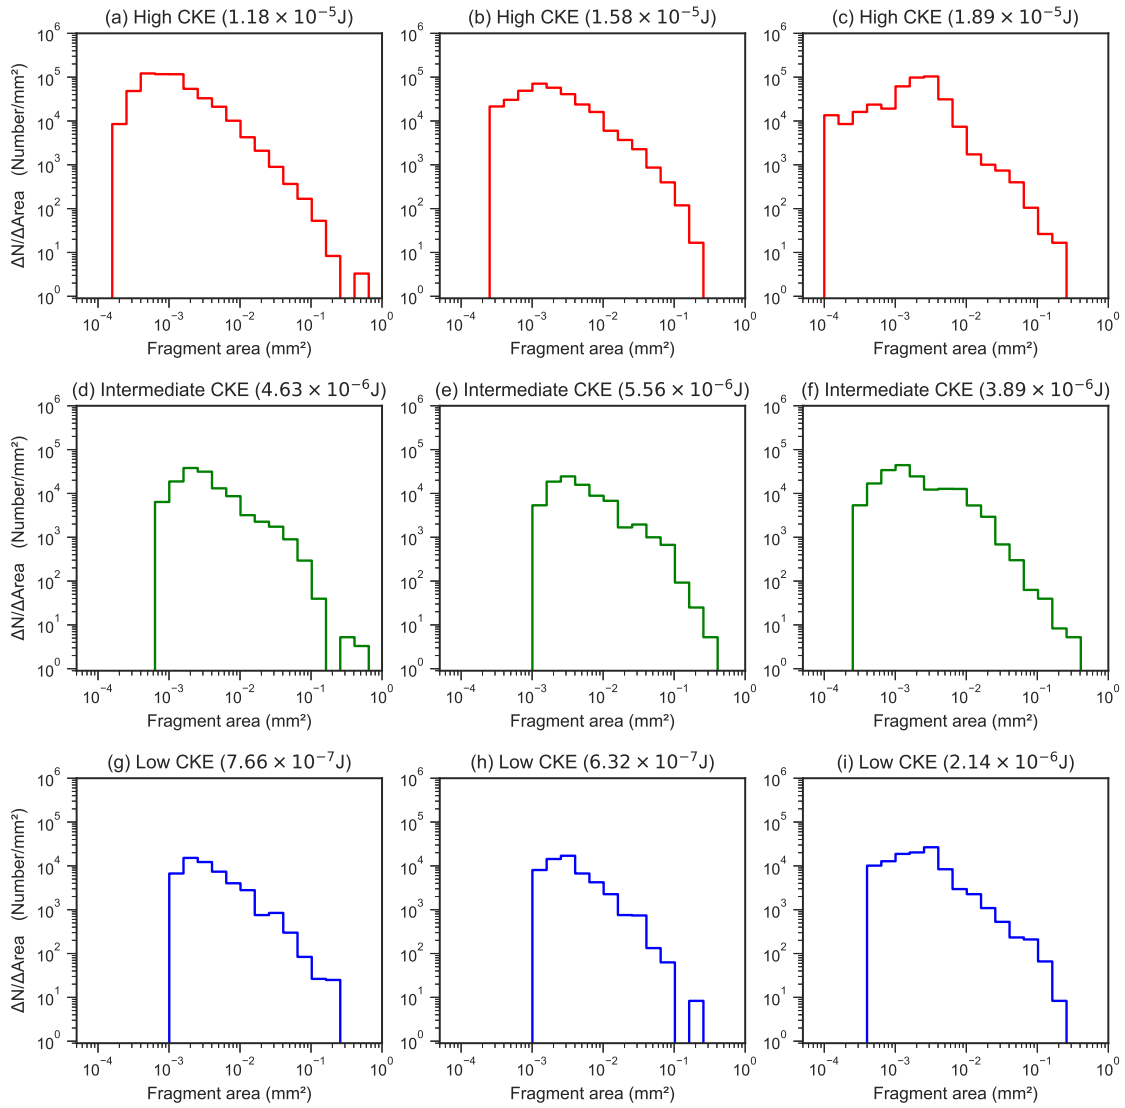

Figure S3: Area distributions of ice fragments produced by graupel-graupel with dendrites collisions. Low CKE in blue, intermediate CKE and high CKE in red.

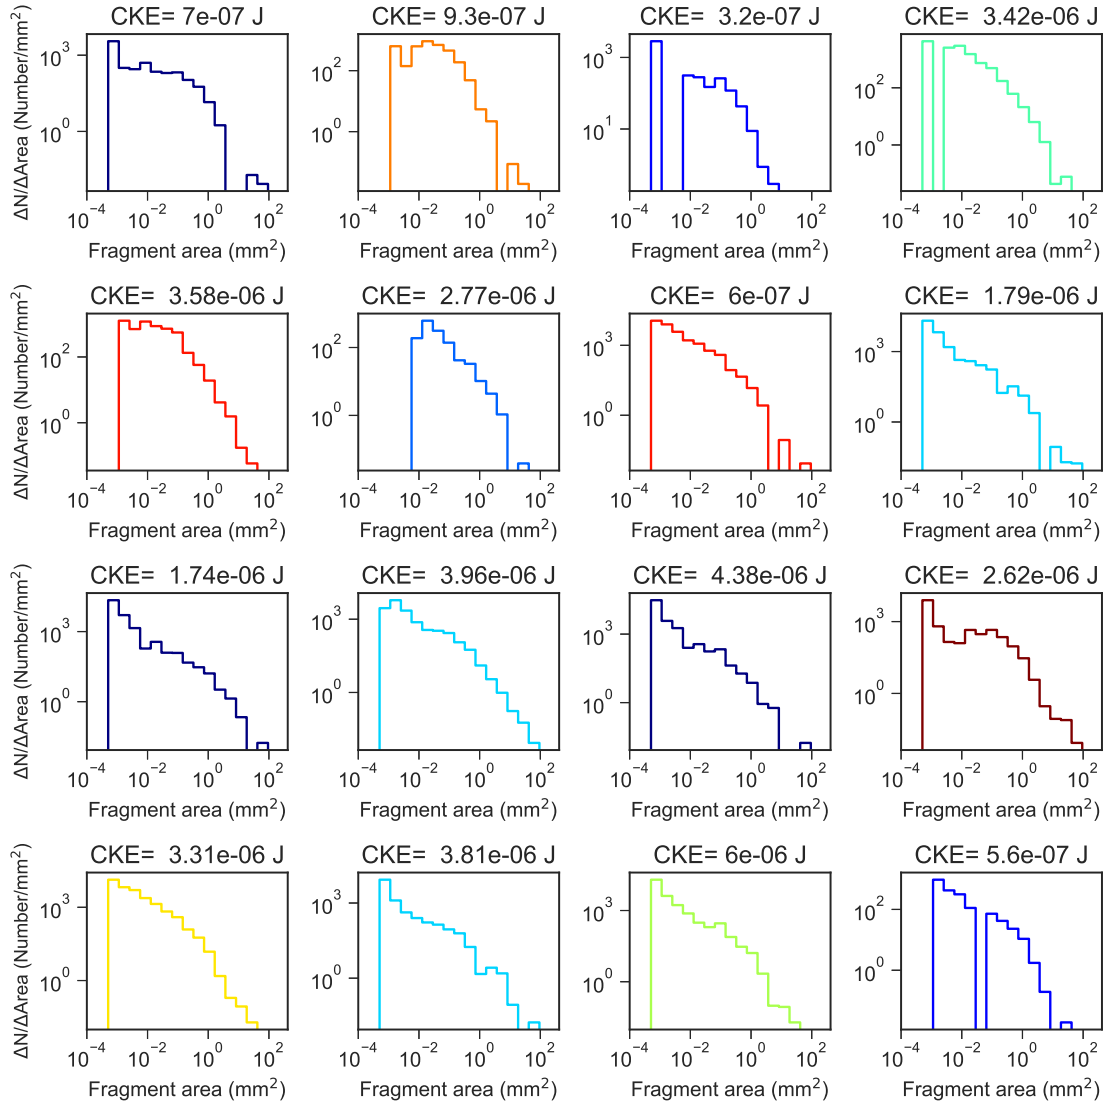

Figure S4: Area distributions of ice fragments produced by graupel-snowflake collisions for different impact positions (see color scale of Fig. 14).

## S4 Distributions of fragments aspect ratio

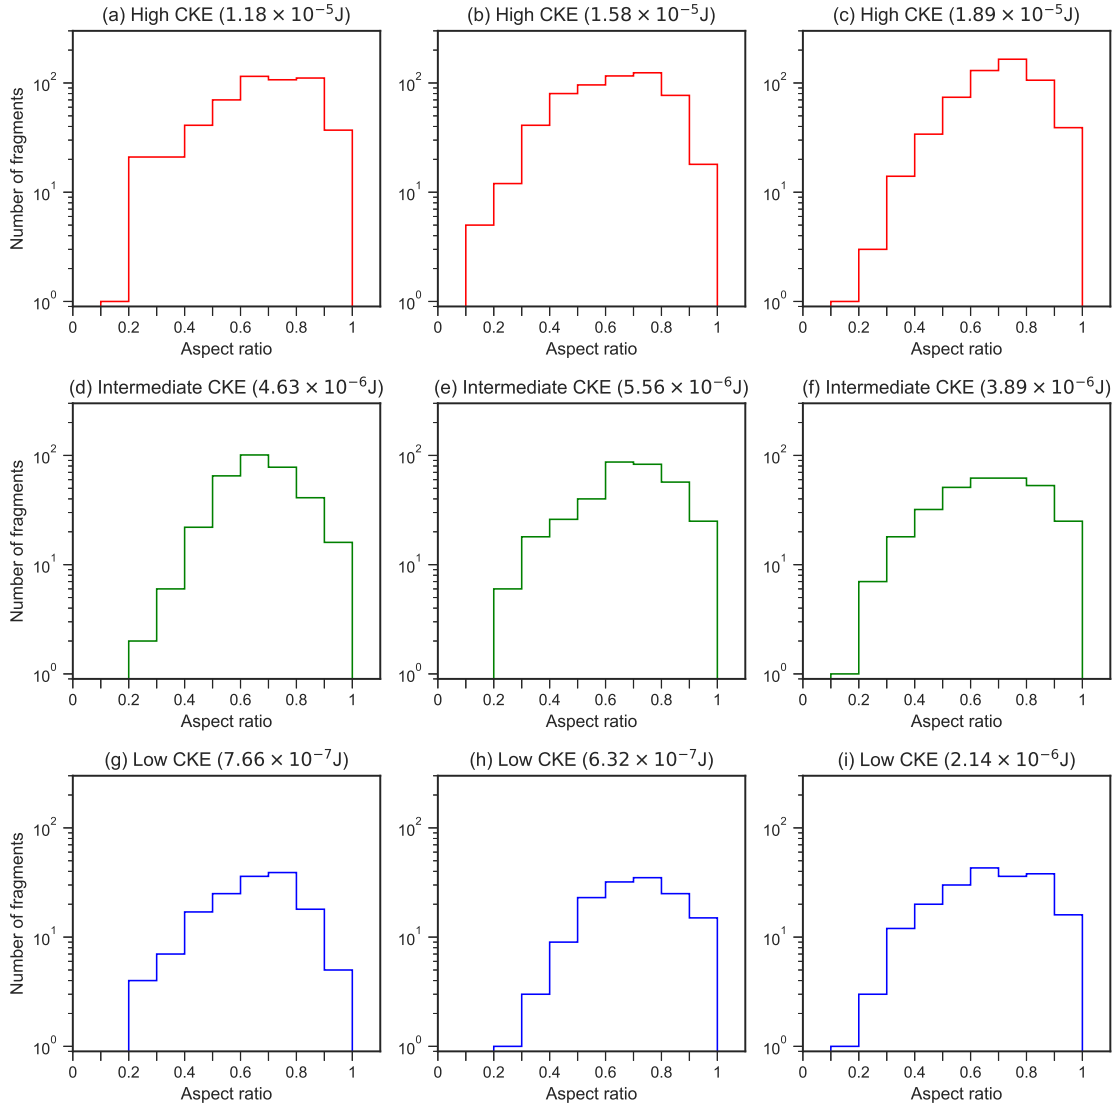

Figure S5: Aspect ratio ( $AR=D_{min}/D_{maj}$ ) distributions of ice fragments produced by graupel-graupel with dendrites collisions. Low CKE in blue, intermediate CKE and high CKE in red.

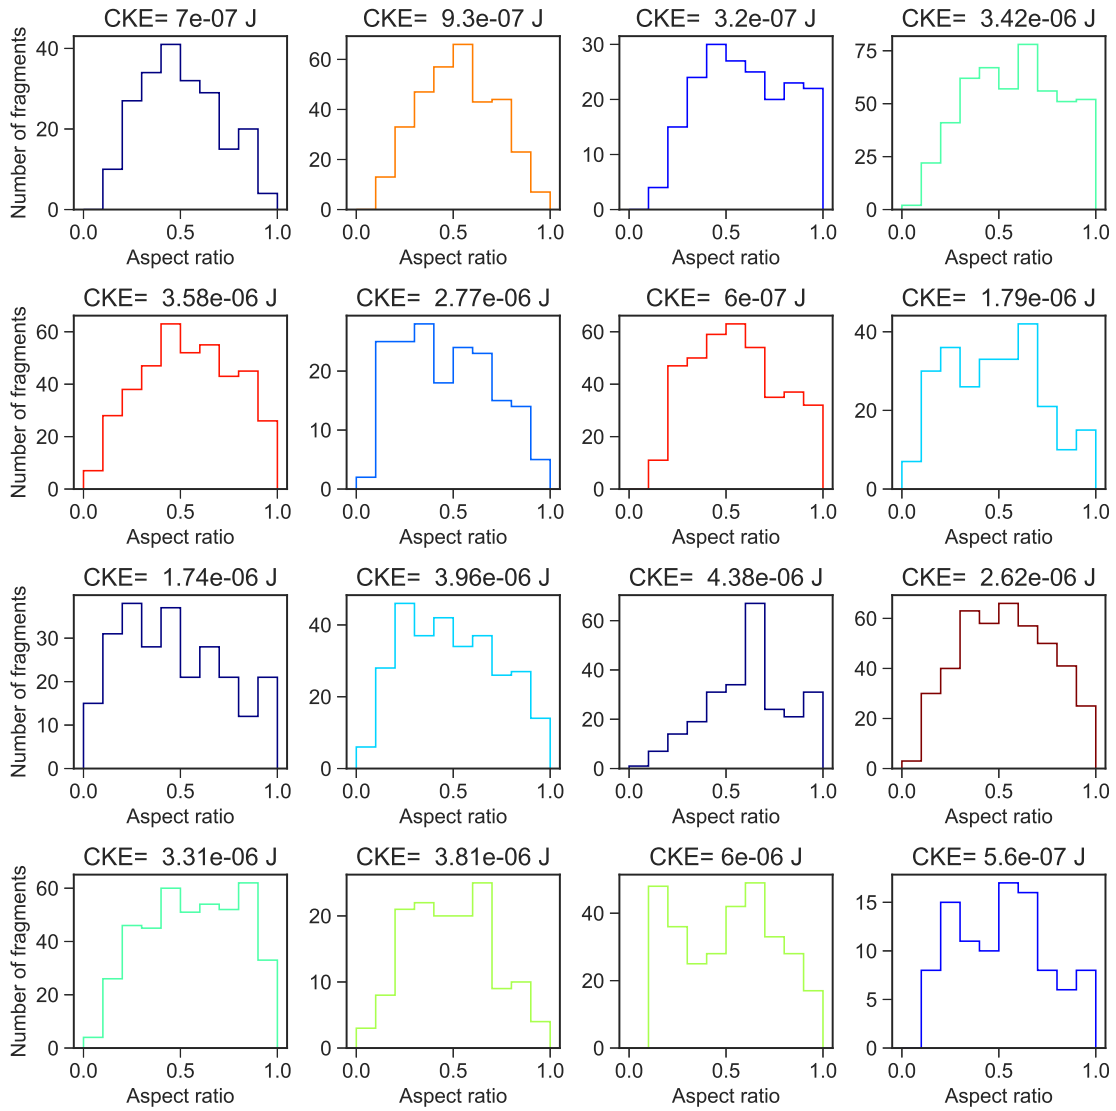

Figure S6: Aspect ratio ( $AR=D_{min}/D_{maj}$ ) distributions of ice fragments produced by graupel-snowflake collisions for different impact positions (see color scale of Fig. 14).

## References

H.R. Pruppacher and James Klett. *Microphysics of Clouds and Precipitation*, volume 18. 2010. ISBN 978-0-7923-4211-3. doi: 10.1007/978-0-306-48100-0.
